# Supplementary material for: Thermal, mechanical and magnetic properties of functionalized magnetite/vinyl ester nanocomposites
Source: Royal Society of Chemistry journal article supplement (doi:10.1039/c6ra17190g), 2016-01-01
Supplement: c6ra17190g1.pdf [file c6ra17190g1.pdf]

## Supporting materials for

### Thermal, mechanical and magnetic properties of functionalized magnetite/vinyl ester nanocomposites

Dawei Jiang <sup>a</sup>, Yinghong Huan <sup>a</sup>, Caiying Sun <sup>\*a</sup>, Chunping Hu <sup>a</sup>,  
Jiang Guo <sup>b</sup>, Jun Long <sup>c</sup>, Mojammel A Khan <sup>d</sup>, David P. Young <sup>d</sup>, Zhanhu Guo <sup>\*b</sup>

<sup>a</sup> College of Science, Northeast Forestry University, Harbin, 150040, China

<sup>b</sup> Department of Chemical and Biomolecular Engineering, University of Tennessee, Knoxville,  
TN 37996, USA

<sup>c</sup> School of Chemical Engineering and Technology, Harbin Institute of Technology, Harbin,  
150001, China

<sup>d</sup> Department of Physics and Astronomy, Louisiana State University, Baton Rouge, LA 70803,  
USA

\*Corresponding author.

E-mail: [sundeyee@126.com](mailto:sundeyee@126.com) (C. Sun), [zhanhu.guo@lamar.edu](mailto:zhanhu.guo@lamar.edu) (Z. Guo)

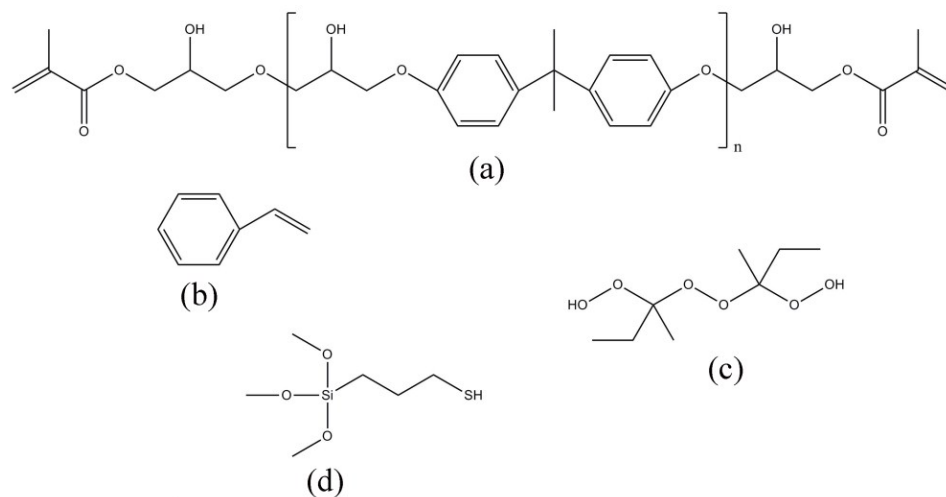

**ESI S1** Chemical structures: **(a)** VER, **(b)** styrene, **(c)** MEKP, and **(d)** (3-mercaptopropyl) trimethoxy-silane (thiol group).

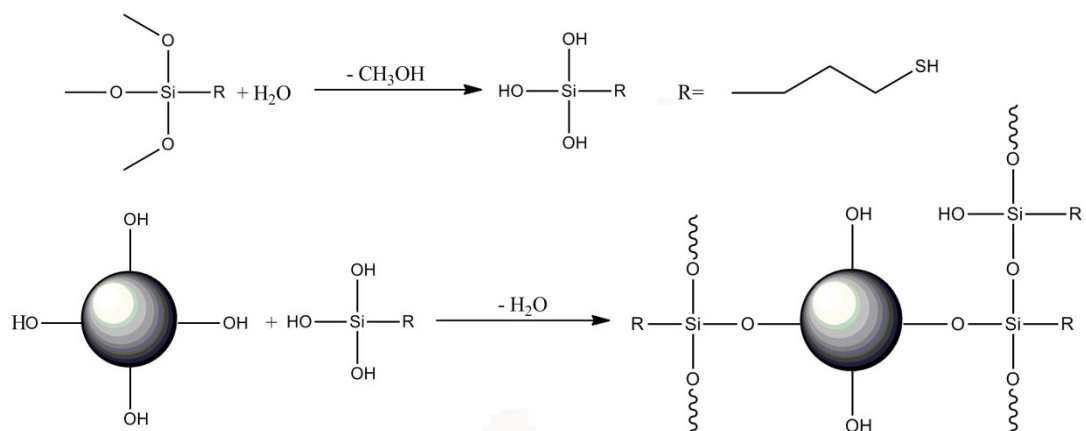

**ESI S2** Reaction of  $\text{Fe}_3\text{O}_4$  with (3-mercaptopropyl) trimethoxy-silane coupling agent.

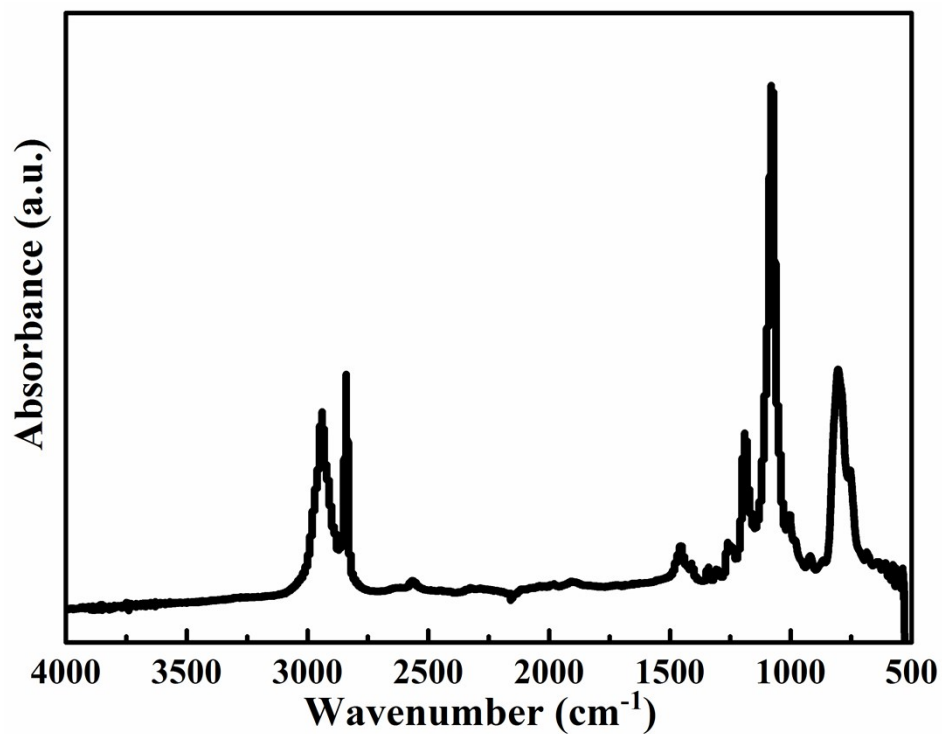

ESI S3 FT-IR spectrum of (3-mercaptopropyl) trimethoxy-silane (thiol group).

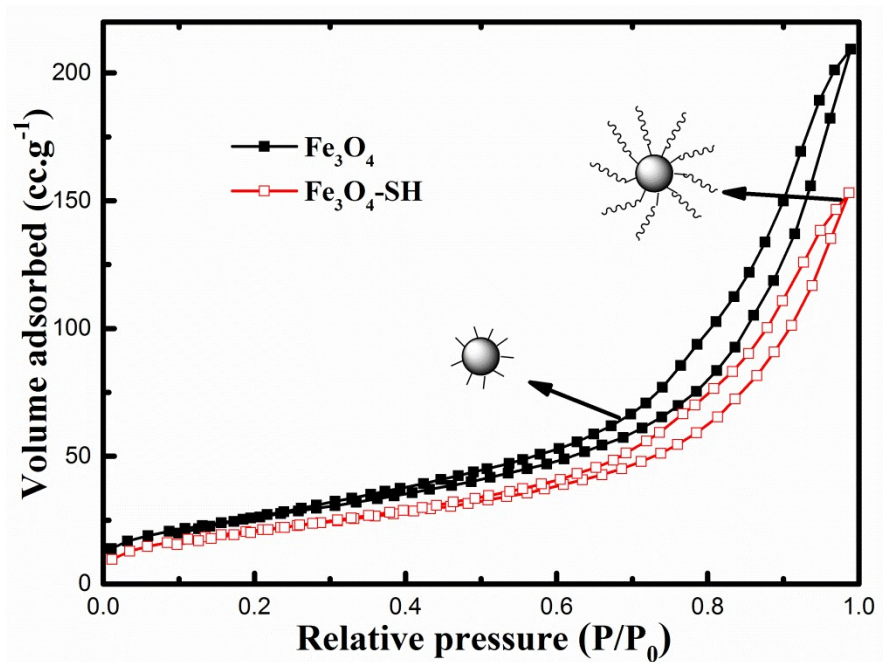

ESI S4 Nitrogen adsorption-desorption isotherm plots (c) as-received  $\text{Fe}_3\text{O}_4$  and  $\text{Fe}_3\text{O}_4\text{-SH}$  nanoparticles.

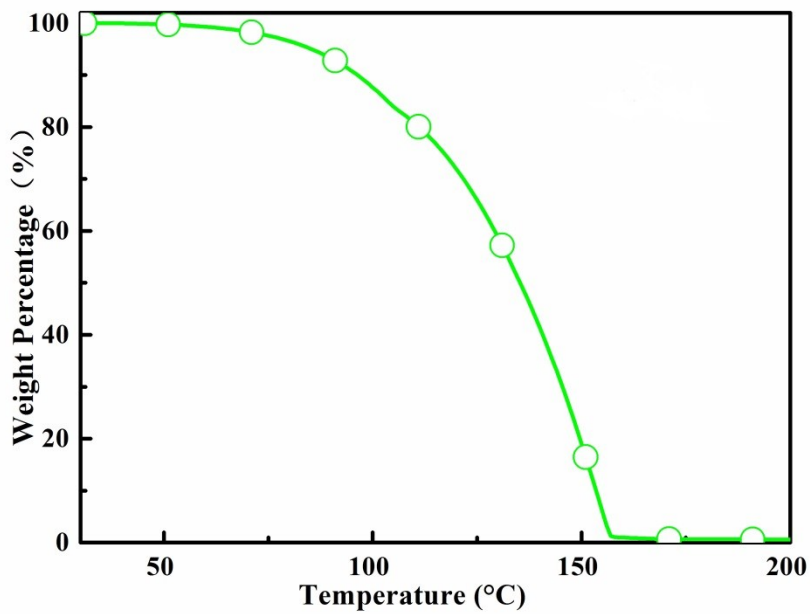

ESI S5 TGA profile of (3-mercaptopropyl) trimethoxy-silane.

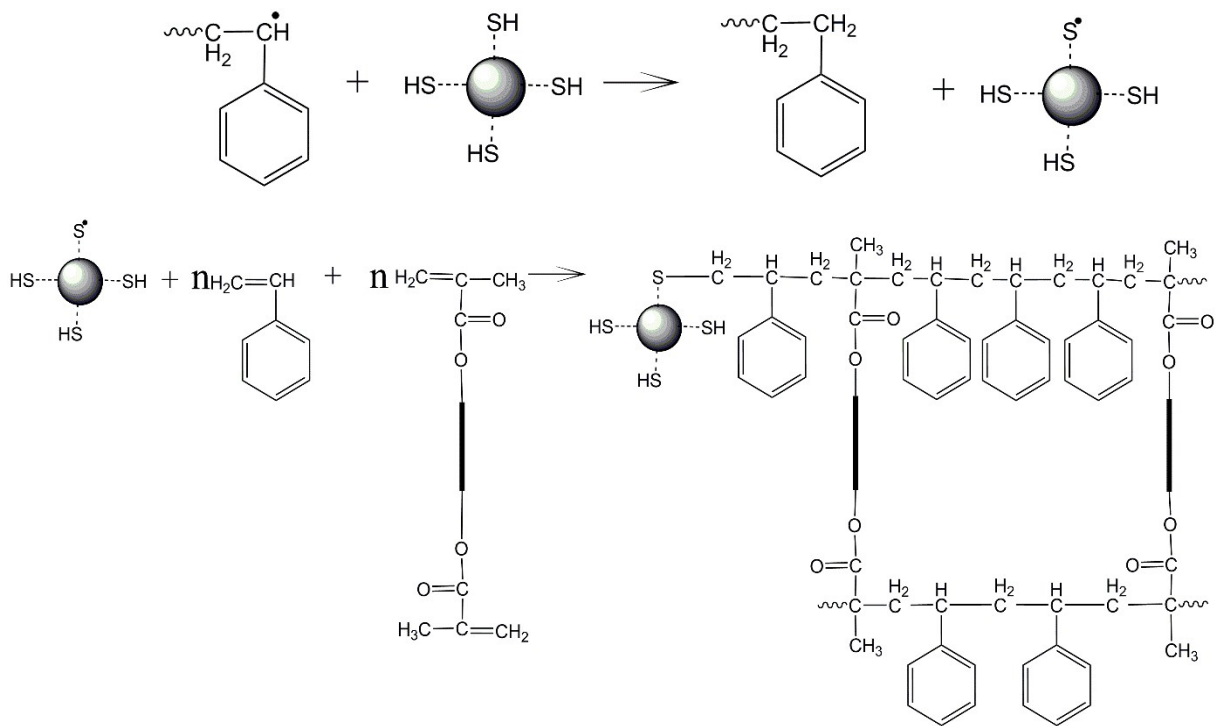

ESI S6 Schematic illustration of reaction process between VER and Fe<sub>3</sub>O<sub>4</sub> with thiol groups.
